# Supplementary material for: A stable two-fold interpenetrated 3D Zn(ii) MOF for fluorescence sensing of uric acid and tryptophan
Source: Royal Society of Chemistry journal article supplement (doi:10.1039/d4ce01283f), 2025-01-01
Supplement: d4ce01283f1.pdf [file d4ce01283f1.pdf]

## **Electronic Supplementary Information**

### **A stable two-fold interpenetrated 3D Zn(II) MOF for fluorescence sensing of uric acid and tryptophan**

Fang-Hua Zhao\*, Yu-Shuo Li, Shu-Qi Li, Xiao-Hong Wu, Yuan-Chun He and Zhong-Lin Li\*

Key Laboratory of Life-Organic Analysis of Shandong Province, School of Chemistry and Chemical Engineering, Qufu Normal University, Qufu 273165, China.

\*Corresponding author. Email: zfh101@163.com (F.-H. Zhao), lizhonglin788@163.com (Z.-L. Li)

## 1. Materials and measurements

All chemical reagents were purchased commercially without any further purification. The FT-IR spectra were recorded from KBr pellets on a Nicolet Magna-IR 560 Infrared spectrometer in the 4000-400  $\text{cm}^{-1}$  region. The solid diffuse reflectance UV-Vis spectra were recorded on a UH4150 spectrophotometer. The thermogravimetric analyses (TGA) were investigated on a standard TG-DTA analyzer under nitrogen flow at a heating rate of 10  $^{\circ}\text{C}/\text{min}$ . Powder X-ray diffraction (PXRD) data were collected with a Bruker D8 Advance diffractometer using a Cu target ( $\lambda = 1.54060 \text{ \AA}$ ) in the range of 5 to 50 $^{\circ}$ . The fluorescence spectra of **1** were collected with a Hitachi F-4600 spectrophotometer at room temperature.

## 2. X-ray Crystallography

The single crystal X-ray diffraction measurement for **1** was determined on a Bruker D8 Quest diffractometer with graphite monochromated Mo  $K\alpha$  radiation ( $\lambda = 0.71073 \text{ \AA}$ ) at 293 K. The structures were solved by direct method and refined by full-matrix least-squares fitting on  $F^2$  by SHELX-2018. All non-hydrogen atoms were refined anisotropically, the hydrogen atoms bound to carbon atoms were calculated theoretically. In this heavy-atom structure, the refinement was completed with no allowance for the ethanol hydrogen atoms in the model. The Crystal data and structure refinements for **1** are listed in Table S1. Selected bond distances and angles are listed in Table S2.

**Table S1.** Crystal data and structure refinements for **1**

| Identification code | <b>1</b>                                                          |
|---------------------|-------------------------------------------------------------------|
| Empirical formula   | $\text{C}_{98}\text{H}_{90}\text{N}_{16}\text{O}_{17}\text{Zn}_4$ |
| Formula weight      | 2025.33                                                           |
| Temperature / K     | 293(2)                                                            |
| Crystal system      | Monoclinic                                                        |
| Space group         | $P2_1/c$                                                          |

|                                           |                                   |
|-------------------------------------------|-----------------------------------|
| $a$ (Å)                                   | 17.9836(9)                        |
| $b$ (Å)                                   | 17.9846(8)                        |
| $c$ (Å)                                   | 14.1550(7)                        |
| $\alpha$ (°)                              | 90                                |
| $\beta$ (°)                               | 97.572(2)                         |
| $\gamma$ (°)                              | 90                                |
| $V$ (Å <sup>3</sup> )                     | 4538.2(4)                         |
| $Z$                                       | 2                                 |
| $\rho_{\text{calc}}$ (g/cm <sup>3</sup> ) | 1.482                             |
| $\mu$ /mm <sup>-1</sup>                   | 1.123                             |
| $R_{\text{int}}$                          | 0.0467                            |
| Reflections collected                     | 76211                             |
| Data/restraints/parameters                | 7980/3/626                        |
| Goodness-of-fit on $F^2$                  | 1.016                             |
| Final $R$ indexes [ $I > 2\sigma(I)$ ]    | $R_1 = 0.0376$<br>$wR_2 = 0.0997$ |
| Final $R$ indexes [all data]              | $R_1 = 0.0492$<br>$wR_2 = 0.1072$ |
| Largest diff. peak/hole/e Å <sup>-3</sup> | 0.829/-0.580                      |
| CCDC                                      | 2411183                           |

**Table S2.** Selected Bond Lengths (Å) and Bond Angles (°) for **1**

|           |            |           |            |           |            |
|-----------|------------|-----------|------------|-----------|------------|
| Zn1-N1    | 2.037(2)   | Zn2-N8    | 2.009(2)   | Zn2-O5    | 1.923(2)   |
| Zn1-N4    | 2.035(2)   | Zn1-O1    | 1.9834(18) | Zn2-O7    | 1.909(2)   |
| Zn2-N5    | 2.022(3)   | Zn1-O3    | 1.960(2)   |           |            |
| N4-Zn1-N1 | 101.95(10) | O3-Zn1-N4 | 105.79(10) | O5-Zn2-N8 | 104.37(11) |
| O1-Zn1-N1 | 105.72(9)  | O3-Zn1-O1 | 120.50(10) | O7-Zn2-N5 | 105.74(11) |
| O1-Zn1-N4 | 115.38(9)  | N8-Zn2-N5 | 102.25(11) | O7-Zn2-N8 | 115.46(10) |
| O3-Zn1-N1 | 105.51(10) | O5-Zn2-N5 | 100.28(12) | O7-Zn2-O5 | 125.37(11) |

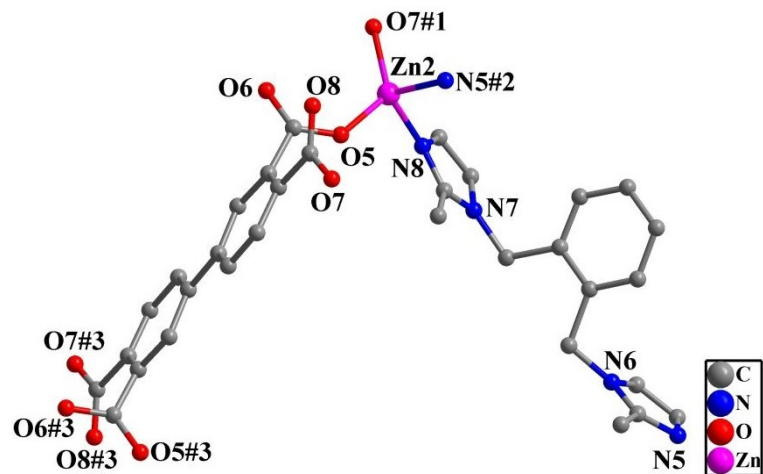

**Fig. S1.** The coordination environment of Zn2 center, [Symmetry codes: #1:  $x, 0.5 - y, -0.5 + z$ ; #2:  $-x, -0.5 + y, 1.5 - z$ ; #3:  $1 - x, 1 - y, 2 - z$ ].

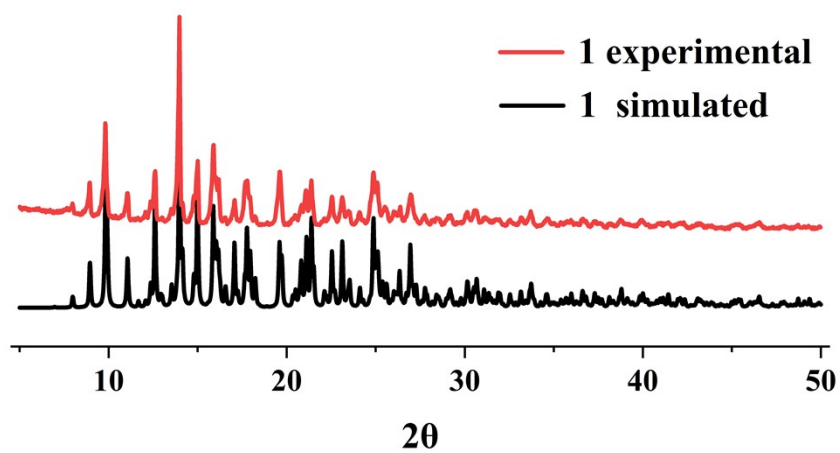

**Fig. S2.** The PXRD of 1.

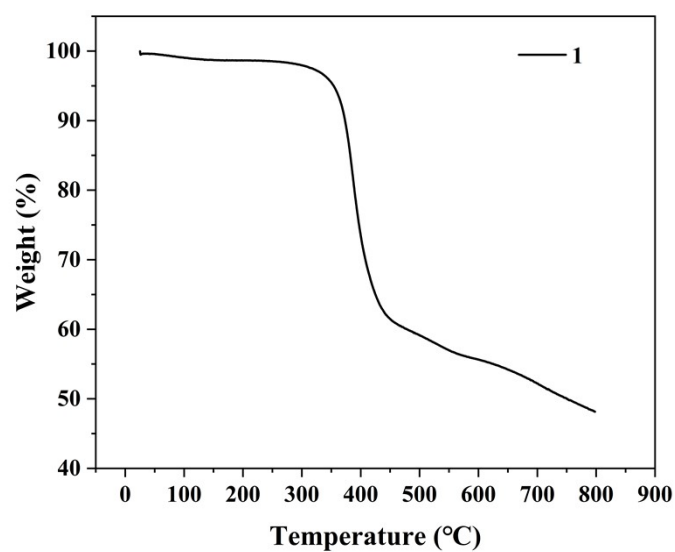

**Fig. S3.** The TGA diagram of 1.

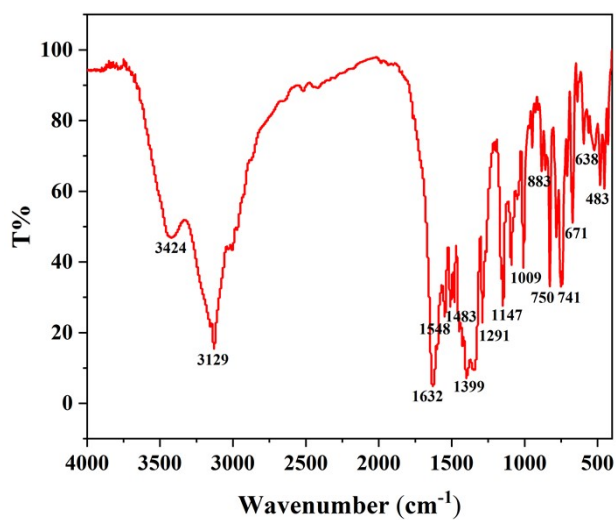

Fig. S4. IR of **1**.

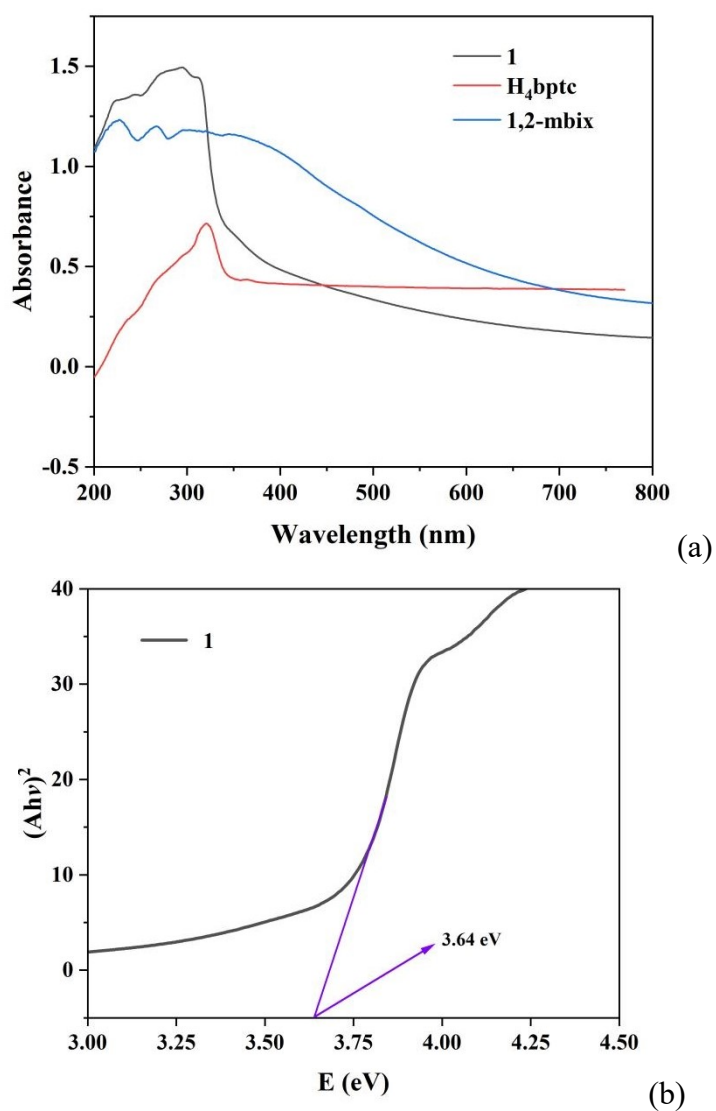

Fig. S5. (a) UV-vis absorption spectra in the solid state of  $H_4bptc$ , 1,2-mbix and **1**; (b) Diffuse reflectance spectra of **1**.

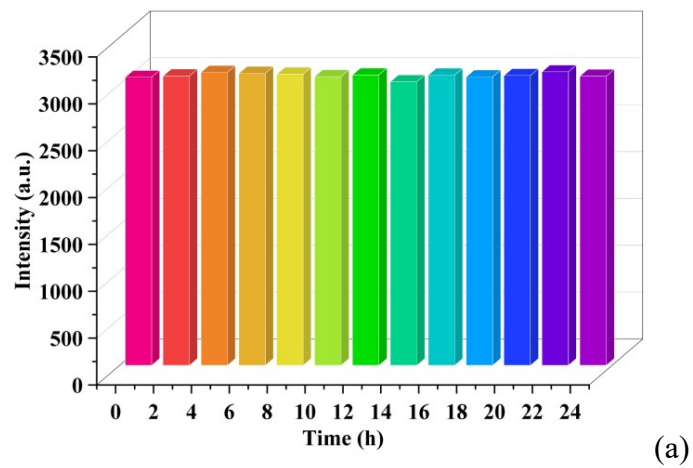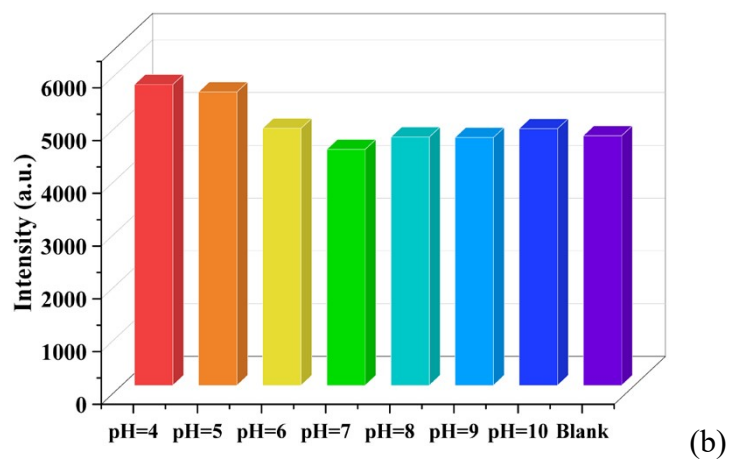

**Fig. S6.** The emission intensities of **1** after immersed in water for different time (a) and at different pH values (b).

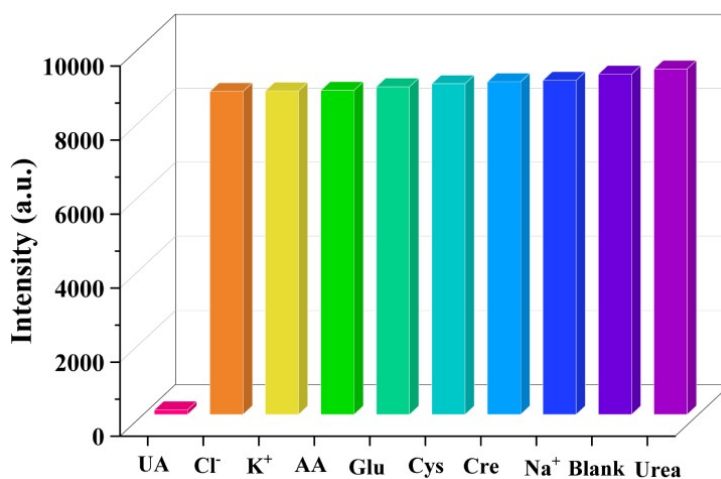

**Fig. S7.** The emission intensities of **1** treated with various biological metabolites.

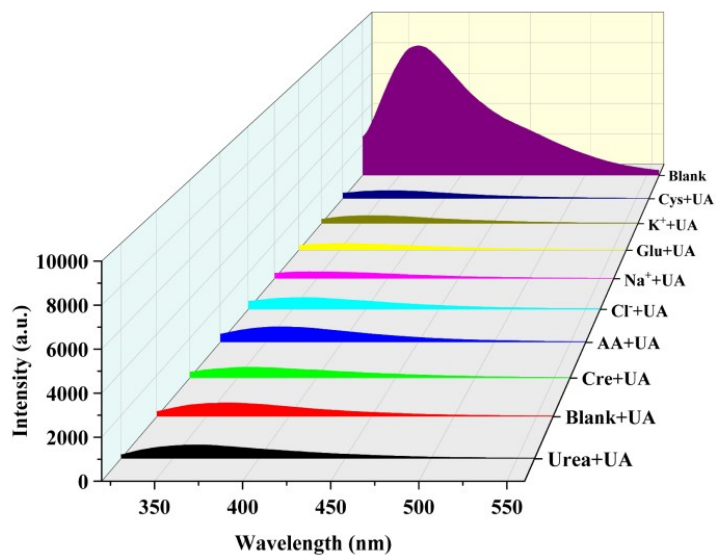

**Fig. S8.** Emission response of **1** in the presence various biological metabolites.

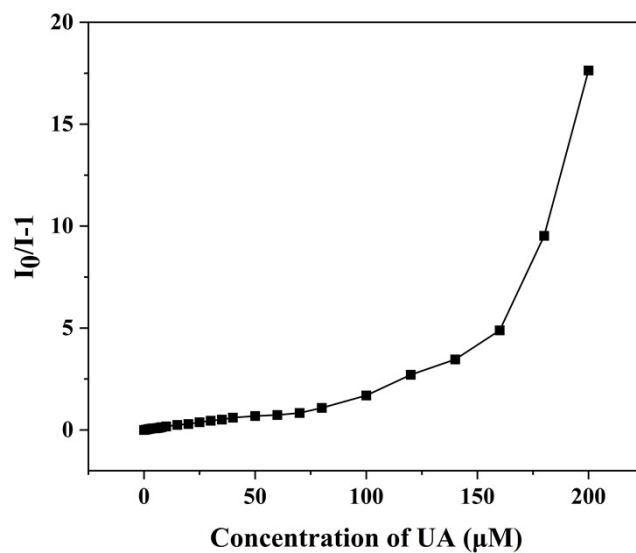

**Fig. S9.** *S-V* plot of **1** toward UA.

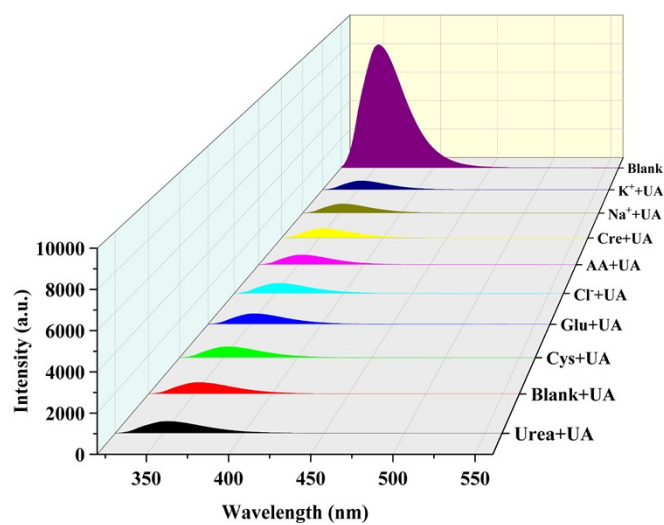

**Fig. S10.** Emission response of **1** in the presence various biological metabolites in serum samples.

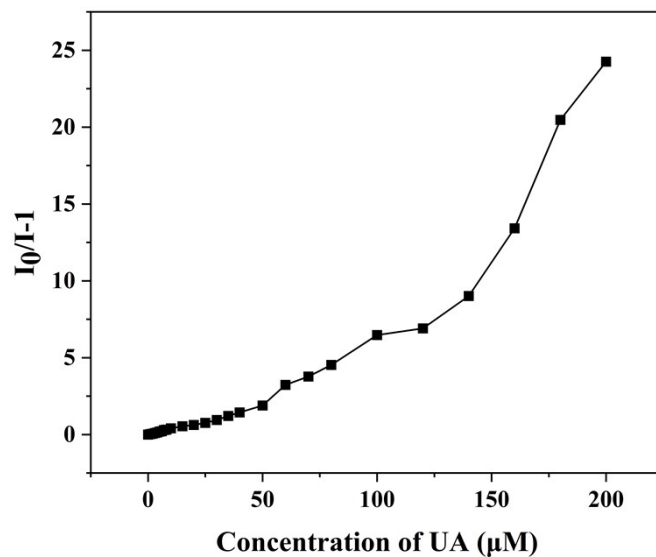

Fig. S11. *S-V* plot of **1** toward UA in serum sample.

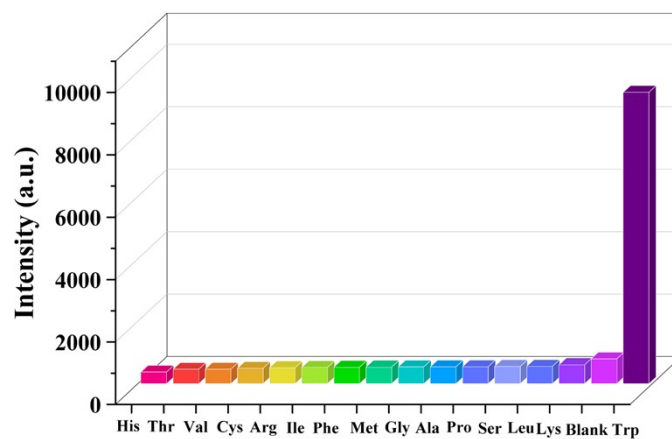

Fig. S12. The emission intensities of **1** treated with various amino acids.

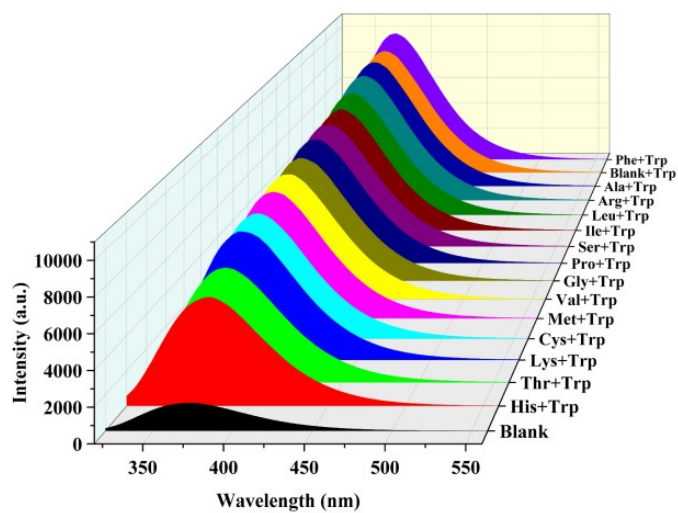

Fig. S13. Emission response of **1** in the presence various amino acids.



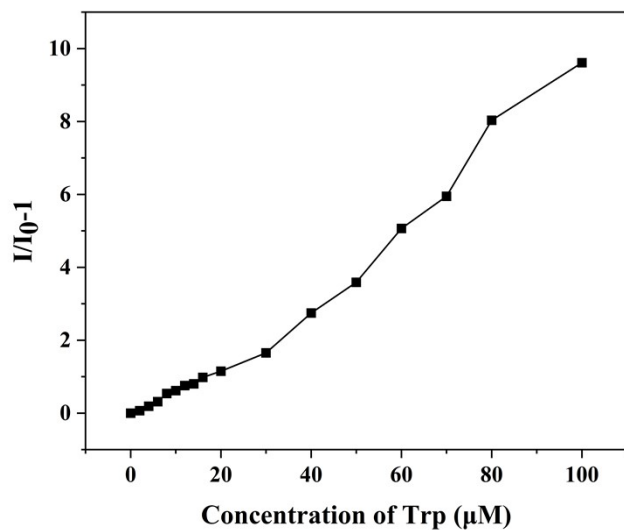

Fig. S14. *S-V* plot of **1** toward Trp.

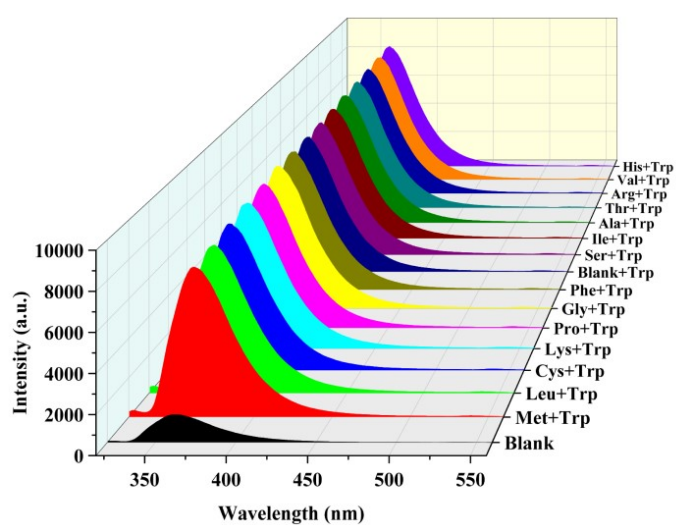

Fig. S15. Emission response of **1** in the presence various amino acids in milk sample.

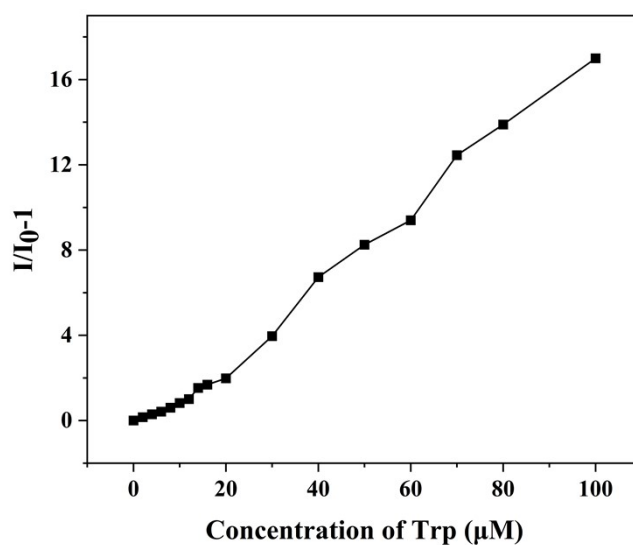

Fig. S16. *S-V* plot of **1** toward Trp in milk sample.

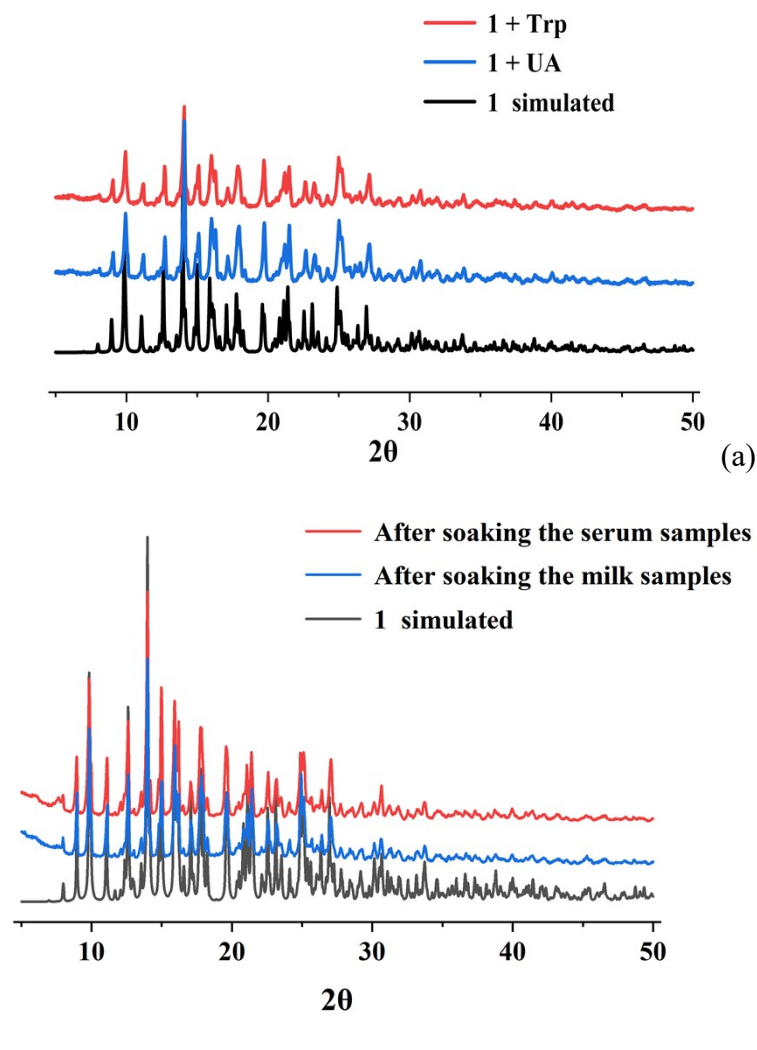

**Fig. S17.** The PXRD patterns of **1** after luminescence sensing experiments with UA and Trp aqueous solutions (a), and after soaking in serum and milk samples (b).

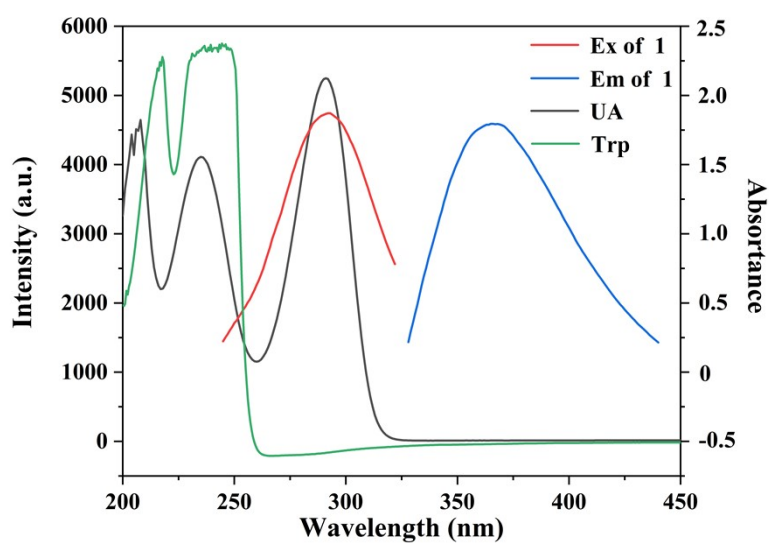

**Fig. S18.** Excitation spectra and emission spectra of **1**, UV spectra of UA and Trp.

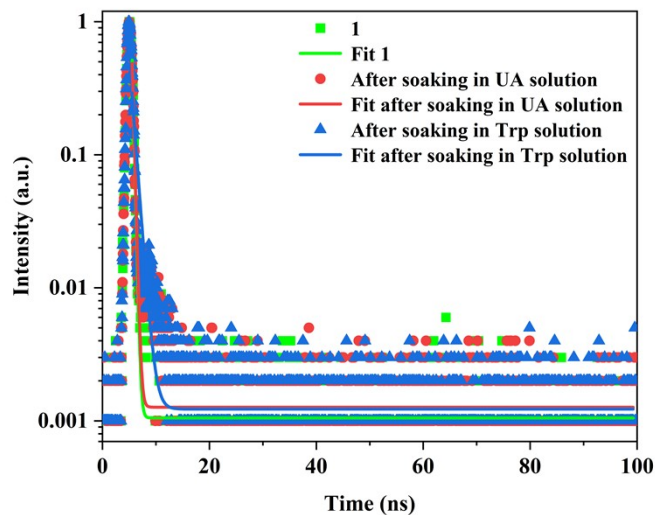

Fig. S19. The fluorescence lifetime of **1** before and after immersed in UA and Trp solutions.

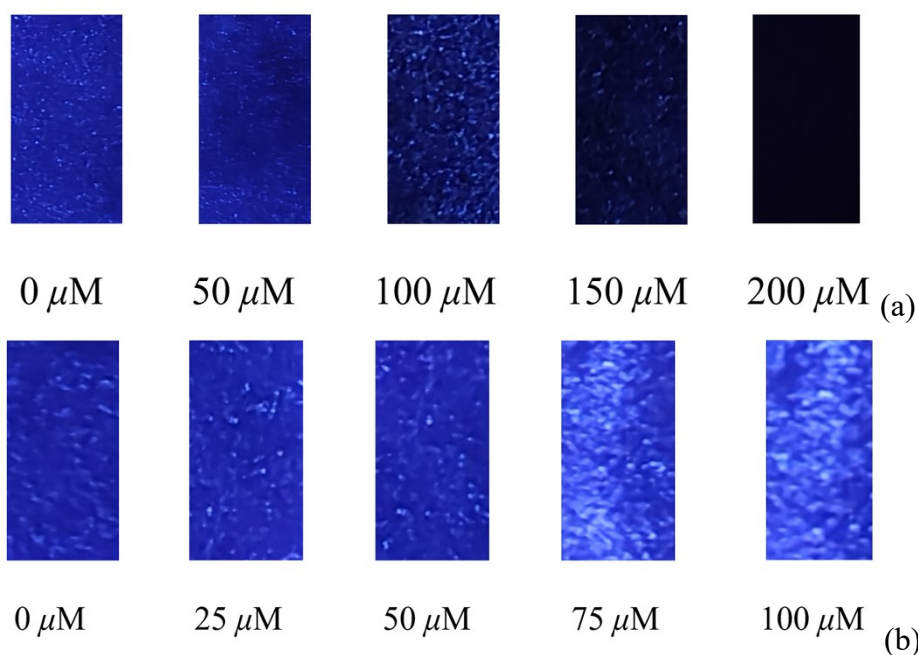

Fig. S20. Luminescent films of **1** with different concentrations of Trp and UA treatment under UV light.

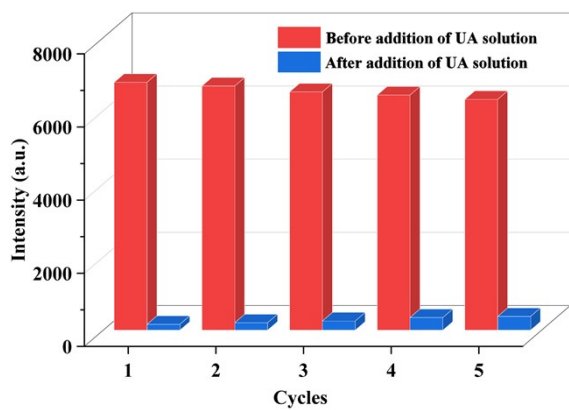

(a)

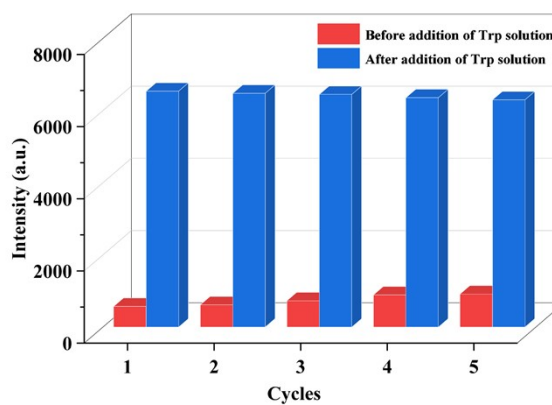

(b)

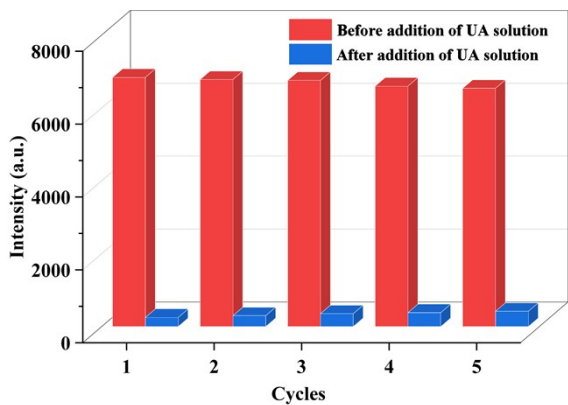

(c)

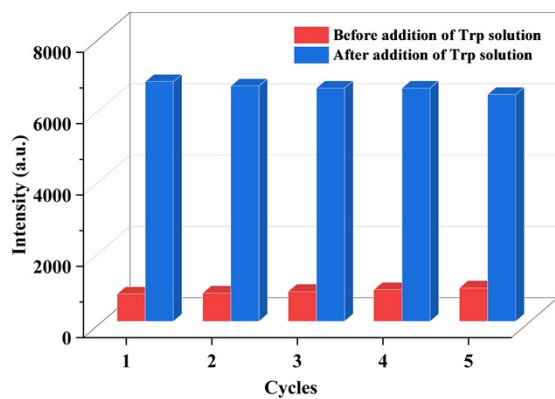

(d)

**Fig. S21.** The fluorescence intensities of **1** after five cycles toward UA in distilled water (a) and serum sample (c), Trp in distilled water (b) and milk sample (d).

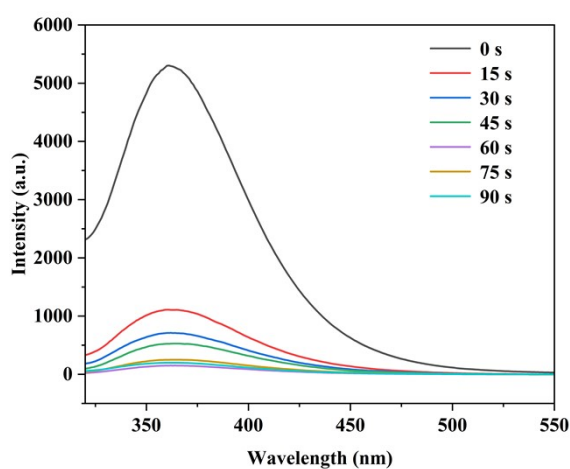

(a)

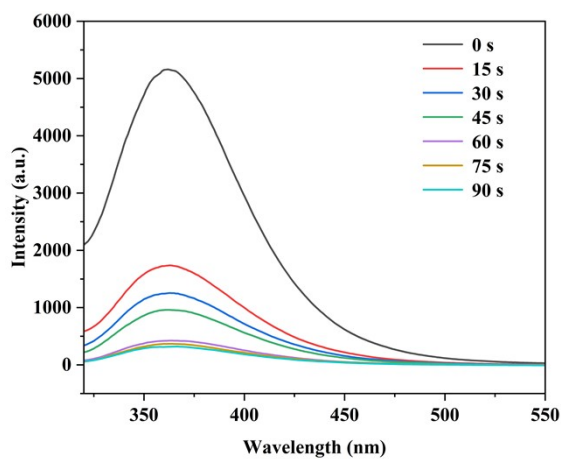

(b)

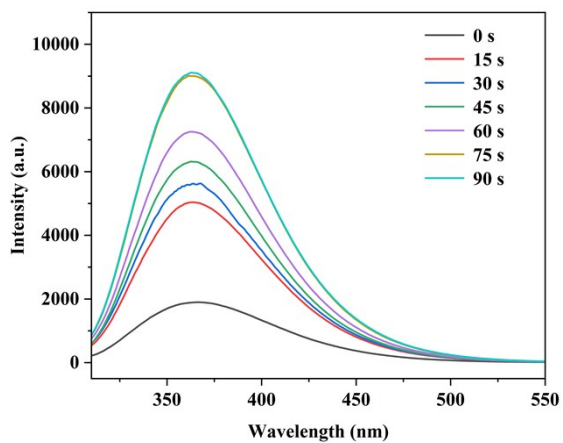

(c)

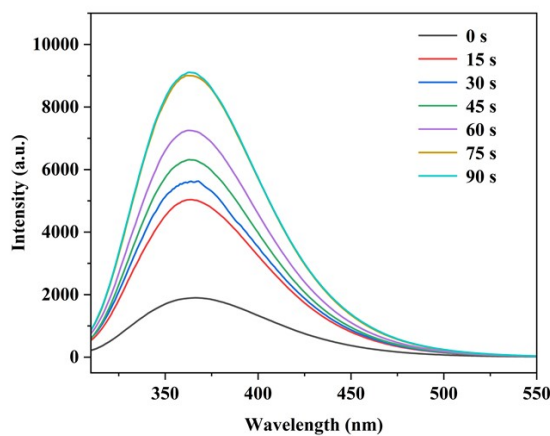

(d)

**Fig. S22.** The fluorescence response time of **1** toward toward UA in distilled water (a) and serum sample (b); and Trp in distilled water (c) and milk sample (d).

**Table S3.** Comparison between MOFs for the sensing of UA

| Fluorescent MOFs                                                                                                                                                                               | Solvent | Methods  | $K_{sv} / M^{-1}$  | LOD / $\mu M$ | Ref.      |
|------------------------------------------------------------------------------------------------------------------------------------------------------------------------------------------------|---------|----------|--------------------|---------------|-----------|
| [Pr(TMOFB)(DMF) <sub>3</sub> ] <sub>n</sub>                                                                                                                                                    | Water   | Turn-off | $7.91 \times 10^3$ | 0.28          | 49        |
| Cu <sup>2+</sup> @Tb-MOFs                                                                                                                                                                      | Water   | Turn-on  | $3.10 \times 10^5$ | 0.65          | 50        |
| {[Zn <sub>3</sub> (BTC) <sub>2</sub> (Bimb) <sub>3.5</sub> ][Zn(HCOO)(Bimb) <sub>1.5</sub> ]<br>}·CH <sub>3</sub> COO·2(CH <sub>3</sub> ) <sub>2</sub> NH·2DMF·9H <sub>2</sub> O} <sub>n</sub> | Water   | Turn-off | $4.50 \times 10^4$ | 2.52          | 51        |
| Tb-dtpa-bdap                                                                                                                                                                                   | Water   | Turn-off | $2.22 \times 10^4$ | 5.80          | 52        |
| Cu <sup>2+</sup> @MIL-91(Al:Eu)                                                                                                                                                                | Water   | Turn-on  | $4.72 \times 10^5$ | 1.60          | 53        |
| {[Zn <sub>2</sub> (bptc)(1,2-mbix) <sub>2</sub> ] <sub>2</sub> ·EtOH} <sub>n</sub> ( <b>1</b> )                                                                                                | Water   | Turn-off | $1.48 \times 10^4$ | 1.26          | this work |

**Table S4.** Comparison between MOFs for the sensing of Trp

| Fluorescent MOFs                                                                                | Solvent | Methods | $K_{sv} / M^{-1}$  | LOD / $\mu M$ | Ref.      |
|-------------------------------------------------------------------------------------------------|---------|---------|--------------------|---------------|-----------|
| [Zn <sub>4</sub> (pta) <sub>3</sub> (H <sub>2</sub> O) <sub>1.5</sub> ]                         | Water   | Turn-on | $3.96 \times 10^6$ | 0.043         | 54        |
| Tb <sup>3+</sup> @[Cd(3-bpdb)(MeO-ip)] <sub>n</sub>                                             | Water   | Turn-on | $1.12 \times 10^3$ | 64.14         | 55        |
| [Cd(L)(TPA) <sub>0.5</sub> (H <sub>2</sub> O)]·H <sub>2</sub> O                                 | Water   | Turn-on | $2.00 \times 10^3$ | 0.065         | 56        |
| [Tb(ppda)(npdc) <sub>0.5</sub> (H <sub>2</sub> O) <sub>2</sub> ] <sub>n</sub>                   | Water   | Turn-on | $2.60 \times 10^5$ | 69.9          | 57        |
| Cd-MOF                                                                                          | DMF     | Turn-on | $2.53 \times 10^4$ | 1.70          | 58        |
| {[Zn <sub>2</sub> (bptc)(1,2-mbix) <sub>2</sub> ] <sub>2</sub> ·EtOH} <sub>n</sub> ( <b>1</b> ) | Water   | Turn-on | $6.16 \times 10^4$ | 0.30          | this work |
